# Supplementary material for: Synthesis of novel cyclodextrin-modified reduced graphene oxide composites by a simple hydrothermal method
Source: Royal Society of Chemistry journal article supplement (doi:10.1039/c8ra07807f), 2018-01-01
Supplement: c8ra07807f1.pdf [file c8ra07807f1.pdf]

## Synthesis of novel cyclodextrin modified reduced graphene oxide composites by simple hydrothermal method

Qingli Huang <sup>1,2</sup>, MingYan Li <sup>1</sup>, LiLi Wang <sup>2</sup>, Honghua Yuan <sup>2</sup>, Meng Wang <sup>2</sup>, Yongping Wu <sup>1\*</sup> and Ting Li <sup>2\*</sup>

we measured the photothermal conversion efficiency ( $\eta$ ) of rGO@CD. The  $\eta$  value was calculated as follows:

$$\eta = hS(\Delta T_{\max} - \Delta T_{\max s}) / I(1 - 10^{-A}) \quad (1) \text{ and } hS = m_s C_s / \tau \quad (2)$$

where  $\eta$  is the photothermal conversion efficiency.  $\Delta T_{\max}$  is the temperature change of the rGO@CD solution at the maximum steady-state temperature,  $\Delta T_{\max s}$  is the temperature change of solvent at the maximum steady-state temperature.  $I$  is the laser power,  $A$  is the absorbance of rGO@CD at 808 nm.  $C_s$  and  $m_s$  is the heat capacity and mass of solvent, respectively.  $\tau$  is the time constant, which is can be determined by the linear curve fitting of temperature cooling time vs its  $\ln(\theta)$ , ( $\theta = \Delta T / \Delta T_{\max}$ ).

---

\* To whom correspondence should be addressed. Fax: ++86-516-83262091.  
E-mail: 100002016057@xzhmu.edu.cn , wyp@xzhmu.edu.cn

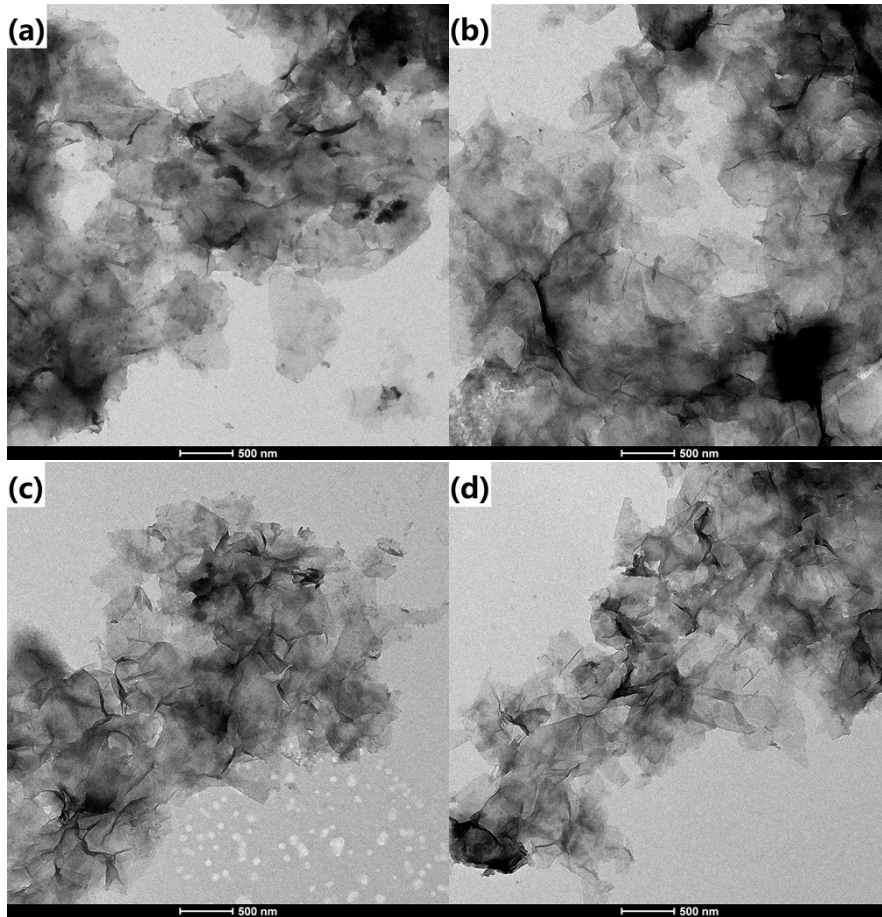

Fig S1. TEM images of rGO@CD in 6 days at different pH (a) 2 days at pH 7.4 (b) 6 days at pH 7.4 (c) 2 days at pH 5.0 (d) 6 days at pH 5.0

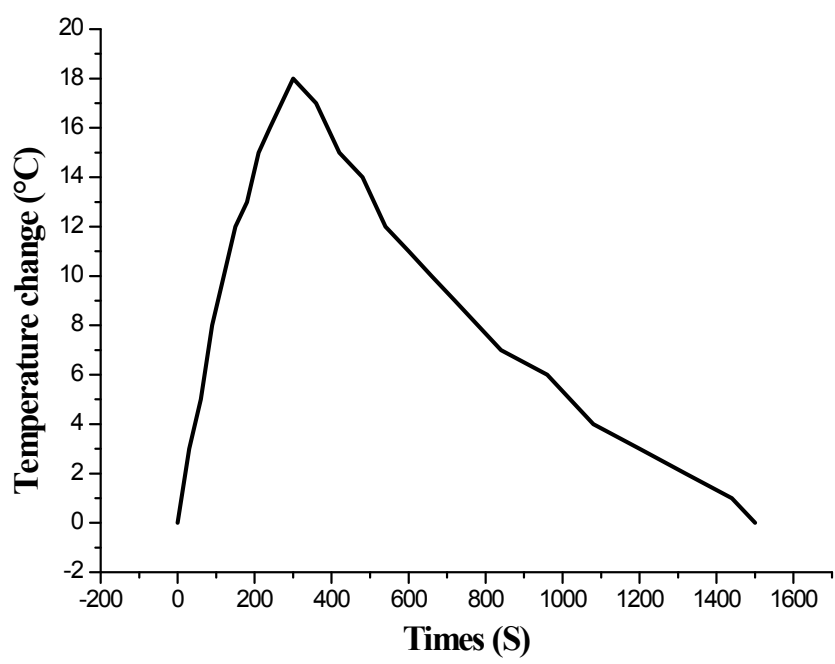

FigS2. The photothermal response of rGO@CD under the NIR irradiation condition (808 nm, continuous wave, 1 W, 300 s), then the laser was turn off.

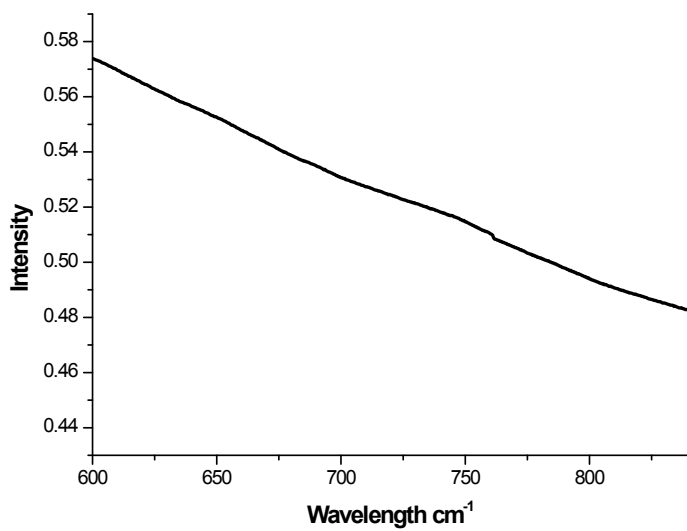

Fig.S3 UV-Vis spectrum of rGO@CD.

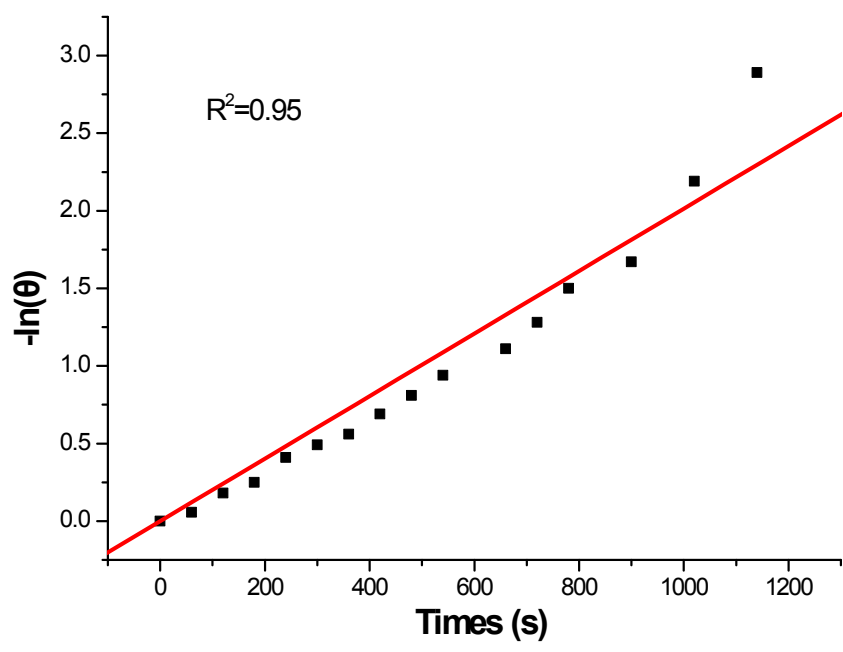

Fig.S4 Linearity curves fitted from the temperature cooling time vsln(θ) of rGO@CD (100 µg/mL).

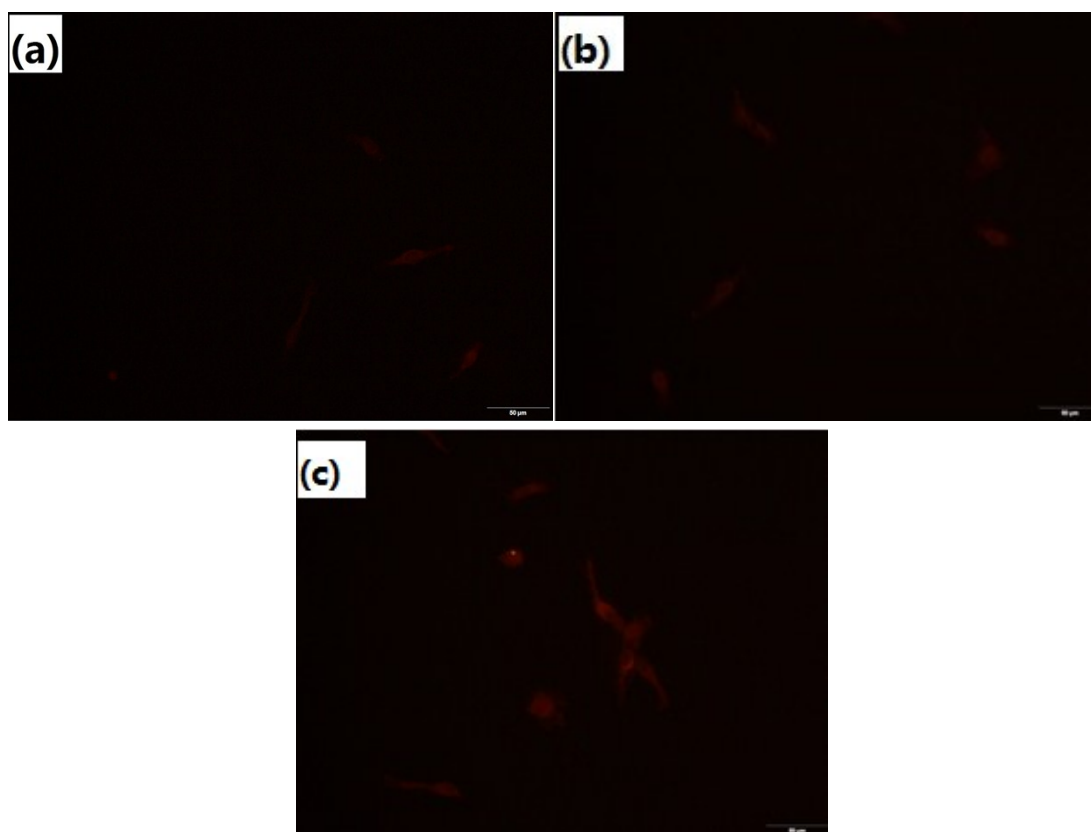

Fig.S5 Intracellular DOX release in SKOV3 cell for different incubating times with 100 µg/mL rGO@CD@PEG@FA@DOX by cell fluorescence imaging (a) 1h (b) 3h (c) 6h.
